# Supplementary material for: An elastic siderophore synthetase and rubbery substrates assemble multimeric linear and macrocyclic hydroxamic acid metal chelators
Source: Royal Society of Chemistry journal article supplement (doi:10.1039/d4sc04888a), 2024-11-25
Supplement: d4sc04888a1.pdf [file d4sc04888a1.pdf]

## Electronic Supplementary Information

# An elastic siderophore synthetase and rubbery substrates assemble multimeric linear and macrocyclic hydroxamic acid metal chelators

Kate P. Nolan,<sup>a</sup> Callum A. Rosser,<sup>a</sup> James L. Wood,<sup>a</sup> Josep Font,<sup>a</sup> Athavan Sresutharsan,<sup>a</sup> Joseph Wang,<sup>a</sup>

Todd E. Markham,<sup>a</sup> Renae M. Ryan<sup>a</sup> and Rachel Codd\*<sup>a</sup>

The University of Sydney, School of Medical Sciences, New South Wales 2006, Australia

### Corresponding author

E-mail: [rachel.codd@sydney.edu.au](mailto:rachel.codd@sydney.edu.au)

### Table of Contents

| Item                                                                                                                                                                                                                                                                                                                                                                        | Page      |
|-----------------------------------------------------------------------------------------------------------------------------------------------------------------------------------------------------------------------------------------------------------------------------------------------------------------------------------------------------------------------------|-----------|
| <b>Fig S1.</b> LC-MS traces from (a–f) commercial <b>1</b> , or (g–l) HPLC-purified <b>1</b> , as detected by total ion current (TIC) (a, g), or shown as an extracted ion chromatogram (EIC) with values set to report the [M+H] <sup>+</sup> adducts of (b, h) <b>1</b> , (c, i) <b>3</b> , (d, j) <b>4</b> , (e, k) <b>5</b> , or (f, l) <b>6</b> .....                  | <b>S2</b> |
| <b>Fig. S2.</b> Theoretical MS/MS fragmentation patterns of <b>1</b> , <b>3–6</b> .....                                                                                                                                                                                                                                                                                     | <b>S2</b> |
| <b>Fig. S3.</b> EIC traces from chelators with excess Ga(III) or Zr(IV) with EIC values set to report Ga(III) (a–d) or Zr(IV) (e–h) complexes with <b>1</b> or <b>8–10</b> , with isotope patterns (upper: experiment; lower: calculated) from the major or asterisked peak in the inset, and the relevant species as a cartoon.....                                        | <b>S3</b> |
| <b>Fig. S4.</b> Sequence alignment (UniProt Blast) <sup>1</sup> between DesD from <i>Streptomyces griseoflavus</i> DSM 40698 <sup>2</sup> (PDB: 7TGK_A) and <i>Salinispora tropica</i> CNB-440 (NCBI Reference Sequence: WP_012013773.1) showing the two conserved residues ( <i>S. griseoflavus</i> DSM 40698 numbering: R303, D497) that interact with the substrate..... | <b>S3</b> |
| <b>References</b> .....                                                                                                                                                                                                                                                                                                                                                     | <b>S3</b> |

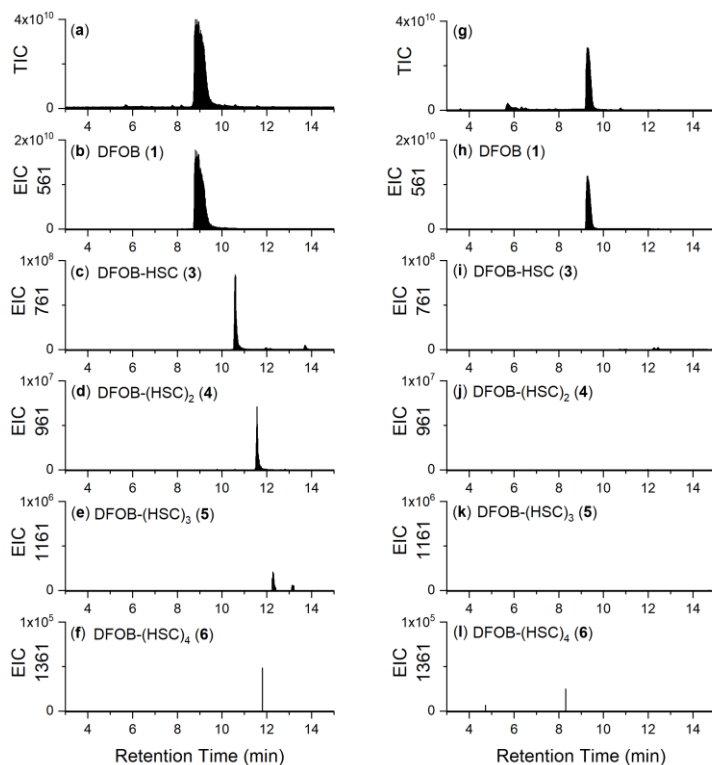

**Fig S1.** LC-MS traces from (a–f) commercial **1**, or (g–l) HPLC-purified **1**, as detected by total ion current (TIC) (a, g), or shown as an extracted ion chromatogram (EIC) with values set to report the  $[M+H]^+$  adducts of (b, h) **1**, (c, i) **3**, (d, j) **4**, (e, k) **5**, or (f, l) **6**.

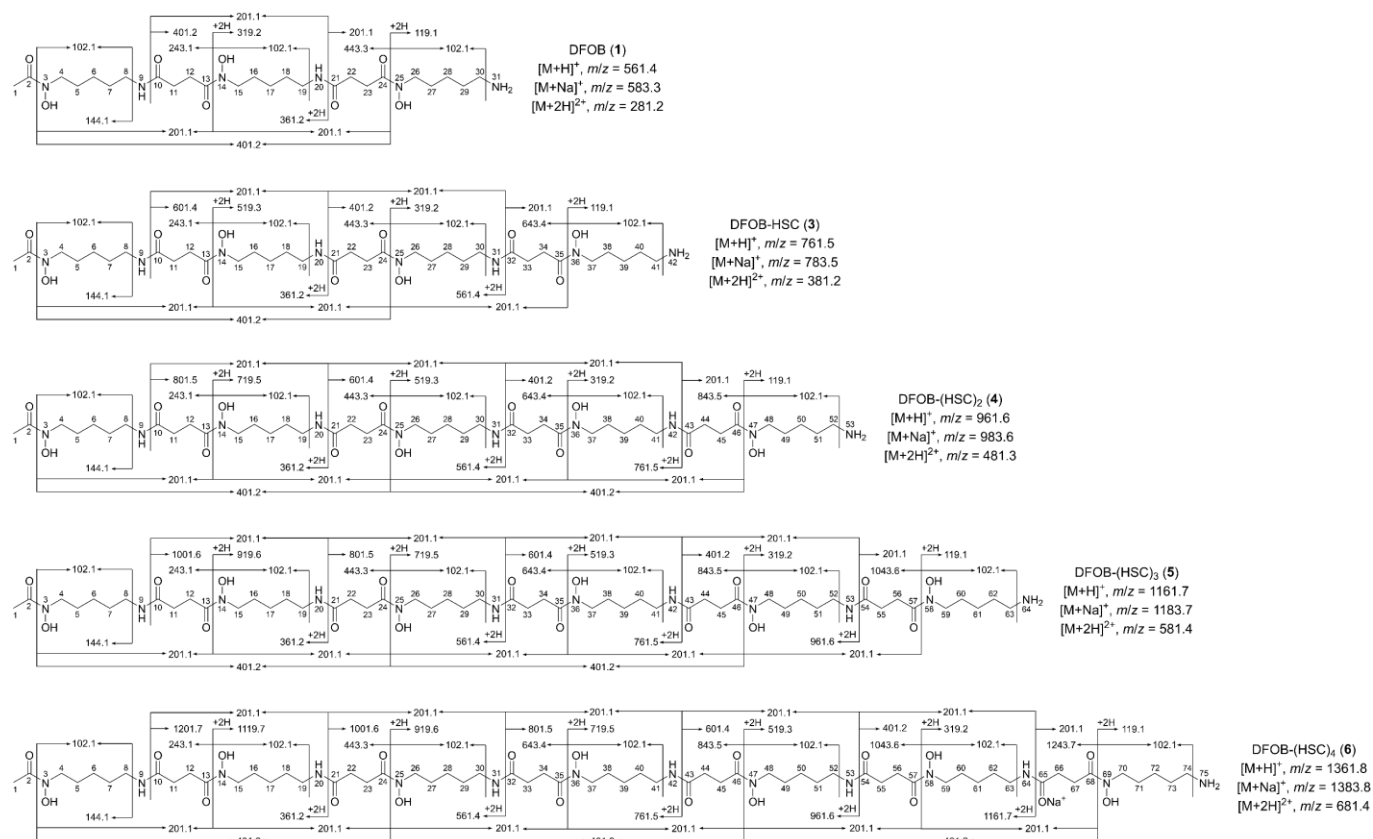

**Fig. S2.** Theoretical MS/MS fragmentation patterns of **1**, **3**–**6**.

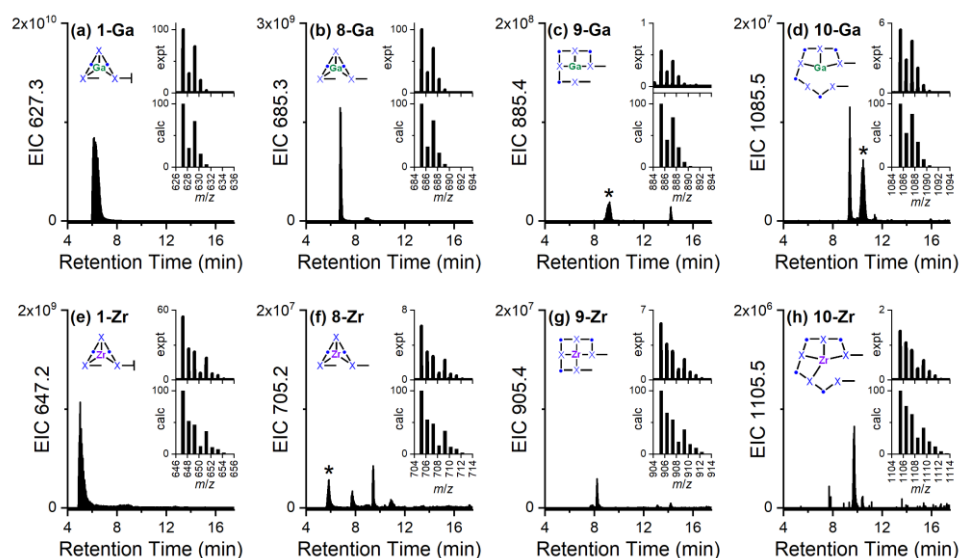

**Fig. S3.** EIC traces from chelators with excess Ga(III) or Zr(IV) with EIC values set to report Ga(III) (a-d) or Zr(IV) (e-h) complexes with **1** or **8–10**, with isotope patterns (upper: experiment; lower: calculated) from the major or asterisked peak in the inset, and the relevant species as a cartoon.

|                               |                                                                               |     |
|-------------------------------|-------------------------------------------------------------------------------|-----|
| WP_012013773.1<br>pdbj 7TGK A | -----MTPGDAVTHLTTPARWEQANRLLVLRKALAEFAHERLLTPEPLPAEPGRYT                      | 49  |
|                               | MGSSHHHHHSSGLVPRGSHMSLTDVAVAHLSPERWEANRLLVLRKALAEFAHERLFTPEPADGQDGRYV         | 69  |
| WP_012013773.1<br>pdbj 7TGK A | VRSDDGTV EYRFTARLLALDHWQIDPDSITRHGESSGQLPVDAGDFCL ELRGALGLSDRVLPVYLEEITA      | 118 |
|                               | VRSDDGLTSYRFTAVRRALDHWQVDAGSITRTRDGAELPLAALDFI ELRHTLGLSDEILPVYLEEISS         | 138 |
| WP_012013773.1<br>pdbj 7TGK A | TLAGSAYKYLARGGPAAEKLV AADFQTVESAMTEGHPCFVANNRGLGFSSEDEYHRYAPEAAAPVRLIWL A     | 187 |
|                               | TLSGTCYKLT KPQVTAAGLLEGGFQALESGMTEGHPCFVANNRGLGFGVDEYLAYAPETAHPVRLVWLA        | 207 |
| WP_012013773.1<br>pdbj 7TGK A | AHRDHSTFSCSAELDYDTLIRTELDEQTRARFAATLAGLGLDLADHHLIPVHPQWWHKL SVTFAGEVA         | 256 |
|                               | AHRSRAAFATAGAGIDYASFVRQELGEETVERFDGVL RGRGLDPADYLLIPVHPQWWNKLSVTFAAEVA        | 276 |
| WP_012013773.1<br>pdbj 7TGK A | RRHLVCLGEGPDDYRAQQSIRTFNLT E P SRHYVKTALSVLNMGFMRGLSAAYMAATPAINDWLANLID       | 325 |
|                               | RQNLVCLGESDDEYLAQQSIRTFNATHPEKHVYKTALSVLNMGFMRGLSAAYMEATPAINDWLDRLID          | 345 |
| WP_012013773.1<br>pdbj 7TGK A | GDEVFRSTGLTILRERAAVGYRHRQYEAATDRYS PYRKMLAALWRESPAQGLEPGRRLATMASLLHVDP        | 394 |
|                               | NDPVLKSTGLSII RERAAVGYRHL EYEAATDRYS PYRKMLAALWRESPVPALRDGESLTTMAALVHVDH      | 414 |
| WP_012013773.1<br>pdbj 7TGK A | EGRSHTAALIAASGLTFAAWLRRYLDAYLVFL LHA FYAHDLAFMPHGENVILVLHEGVVERVIFKDI AE      | 463 |
|                               | EGRSVAGELIARSGLAPTAWLRHYLRAYYTPLLHSFYAYDLAFMPHGENTILVLKDGVVQR AVYKDI AE       | 483 |
| WP_012013773.1<br>pdbj 7TGK A | EIVVMSADAPLP PAVERI RADVP EQMRLLSIF TDV I DCFLRHLNAVLVEAGVCP EETFWQTVAES AAGY | 532 |
|                               | EIVVMDPDAVLPPEVRRVRAEVPEDMKLLSIF TDV FDCFFRFLAAGLATEEVLAEEDDFWRTVAEVTREY      | 552 |
| WP_012013773.1<br>pdbj 7TGK A | LDRVPHLAERARRYDLFAPEFALSCLNRLQLRDNQ QMVLDLADPAGALQLVGTLANPLAPYRPGT            | 596 |
|                               | QEAHPELDDRFRQYDLFAPEFALSCLNRLQLRDNRQ QMVLDLADPSAALQLVGTLRNPLAGL - - -         | 612 |

**Fig. S4.** Sequence alignment (UniProt Blast)<sup>1</sup> between DesD from *Streptomyces griseoflavus* DSM 40698<sup>2</sup> (PDB: 7TGK\_A) and *Salinispora tropica* CNB-440 (NCBI Reference Sequence: WP\_012013773.1) showing the two conserved residues (*S. griseoflavus* DSM 40698 numbering: R303, D497) that interact with the substrate.

## References

1. The UniProt Consortium. UniProt: the Universal Protein Knowledgebase in 2023. Nucl Acids Res. 2023;51(D1):D523–D31. <https://doi.org/10.1093/nar/gkac1052>.
2. Yang J, Banas VS, Patel KD, Rivera GSM, Mydy LS, Gulick AM, Wenciewicz TA. An acyl-adenylate mimic reveals the structural basis for substrate recognition by the iterative siderophore synthetase DesD. J Biol Chem. 2022;298(8):102166. 10.1016/j.jbc.2022.102166.
